# Supplementary material for: Identification of the long, edited dsRNAome of LPS-stimulated immune cells
Source: HighWire-hosted journal article supplement (doi:10.1101/gr.203992.116), 2016-04-21
Supplement: Supplemental_Table_S2.xlsx [file Supplemental_Table_S2.xlsx]

## Sheet: Mouse
Supplemental Table S2. Features of mEERs
EER Name	Associated Gene	#Windows	Chr	Start	Stop	Length	Strand	BW_#Obs	BW_Start	BW_Stop	PolyA Site	PolyA in EER	Osenberg	Smale C/N Ratio	Smale Localization	ΔG	ΔG/nt	Primary Annotation	Conserved hEAG
mEER99	Bax	4	chr7	45471136	45473520	2384	-	7	45472822	45472850	Bax	mEER99		3.05052	cytoplasm	-839	-0.35193	Unannotated
mEER96	Gabarapl2	5	chr8	111953293	111954297	1004	+	7	111953467	111953510	Gabarapl2	mEER96		5.46394	cytoplasm	-365.5	-0.364044	Unannotated	Gabarapl2
mEER91	Soat1	11	chr1	156427490	156429256	1766	-	7	156427520	156427571	Soat1	mEER91		0.264635	nuclear	-614.7	-0.348075	3'UTR	Soat1
mEER90	Apobec3	13	chr15	79907501	79908782	1281	+	7	79907501	79907547	Apobec3	mEER90		1.3195	cytoplasm	-430.2	-0.335831	3'UTR
mEER87	Commd7	3	chr2	153617266	153618390	1124	-	8	153617266	153617310	Commd7	mEER87		3.25974	cytoplasm	-383	-0.340747	3'UTR
mEER8	Ms4a4c	15	chr19	11426817	11433272	6455	+	15	11426817	11426845	Ms4a4c	mEER8		0.204834	nuclear	-2173	-0.336638	Unannotated
mEER74	Jmjd4	6	chr11	59456200	59458378	2178	+	8	59456245	59456284	Jmjd4	mEER74		1.39233	cytoplasm	-791.1	-0.363223	3'UTR
mEER73	Tapbp	7	chr17	33928327	33928764	437	+	8	33928520	33928558	Tapbp	mEER73	Tapbp	0.239616	nuclear	-192.2	-0.439817	3'UTR	Tapbp
mEER72	Psma3	7	chr12	70994600	70995214	614	+	8	70995112	70995158	Psma3	mEER72		1.91915	cytoplasm	-182.7	-0.297557	3'UTR
mEER71	Adap2	7	chr11	80178844	80180387	1543	+	8	80180312	80180351	Adap2	mEER71		2.00078	cytoplasm	-492.6	-0.319248	Unannotated	Adap2
mEER7	Slfn5	17	chr11	82962563	82963686	1123	+	15	82963191	82963241	Slfn5	mEER7		0.903184	nuclear	-388.8	-0.346215	Unannotated	Slfn5
mEER69	Tox4	9	chr14	52293365	52295438	2073	+	8	52293416	52293456	Tox4	mEER69		1.20937	cytoplasm	-646.6	-0.311915	3'UTR
mEER65	Pmpca	2	chr2	26396021	26396564	543	+	9	26396021	26396068	Pmpca	mEER65	Pmpca	1.53048	cytoplasm	-155.5	-0.286372	3'UTR
mEER63	Hif1a	2	chr12	73946379	73947514	1135	+	9	73947487	73947514	Hif1a	mEER63		1.11663	cytoplasm	-262.1	-0.230925	3'UTR	Hif1a
mEER61	Ccnd2	2	chr6	127128274	127130225	1951	-	9	127128274	127128300	Ccnd2	mEER61		2.85805	cytoplasm	-553.1	-0.283496	3'UTR
mEER58	Mfap1a	7	chr2	121490759	121493823	3064	-	9	121493208	121493253	Mfap1a	mEER58		1.75183	cytoplasm	-951.8	-0.31064	3'UTR
mEER51	BC005537	11	chr13	24814552	24815646	1094	+	9	24815571	24815615	BC005537	mEER51		1.64069	cytoplasm	-431.9	-0.39479	Unannotated	BC005537
mEER50	Optn	12	chr2	5019951	5021299	1348	-	9	5021037	5021088	Optn	mEER50		2.69676	cytoplasm	-508.5	-0.377226	Unannotated
mEER5	H2-T24	32	chr17	36003843	36006592	2749	-	17	36004391	36004421	H2-T24	mEER5		0.450533	nuclear	-1119.2	-0.40713	Unannotated
mEER44	Pfas	4	chr11	68985921	68986892	971	-	10	68985935	68985982	Pfas	mEER44				-305.3	-0.314418	3'UTR
mEER41	Acp2	6	chr2	91213225	91214082	857	+	10	91214032	91214082	Acp2	mEER41		0.386334	nuclear	-270.6	-0.315753	3'UTR
mEER38	Agl	8	chr3	116744073	116744717	644	-	10	116744073	116744122	Agl	mEER38		1.43032	cytoplasm	-261.8	-0.406522	3'UTR
mEER36	Dnph1	10	chr17	46499375	46499949	574	+	10	46499830	46499880	Dnph1	mEER36				-298.3	-0.519686	Introns
mEER342	Padi2	2	chr4	140950968	140951612	644	+	3	140950968	140950979	Padi2	mEER342		1.75524	cytoplasm	-211.4	-0.328261	3'UTR
mEER340	Stam	2	chr2	14148048	14148772	724	+	3	14148048	14148057	Stam	mEER340		1.62908	cytoplasm	-189.2	-0.261326	Unannotated
mEER34	Car5b	17	chrX	163976891	163979036	2145	-	10	163978364	163978414	Car5b	mEER34		1.71024	cytoplasm	-796.8	-0.371469	3'UTR	Car5b
mEER333	Samd8	2	chr14	21796763	21797813	1050	+	3	21796763	21796770	Samd8	mEER333		0.932875	nuclear	-324.7	-0.309238	3'UTR
mEER33	Snap23	18	chr2	120600590	120602271	1681	+	10	120600836	120600882	Snap23	mEER33		1.63151	cytoplasm	-579.7	-0.344854	Unannotated
mEER32	Cds2	3	chr2	132308155	132309884	1729	+	11	132308155	132308177	Cds2	mEER321		0.341871	nuclear	-594.3	-0.343725	3'UTR	Cds2
mEER321	Psmd9	2	chr5	123248656	123249756	1100	+	3	123248656	123248674	Psmd9	mEER321		2.15682	cytoplasm	-420	-0.381818	3'UTR
mEER305	Gyk	2	chrX	85702930	85703327	397	-	3	85702930	85702934	Gyk	mEER305				-73.3	-0.184635	3'UTR
mEER3	Mad2l1	19	chr6	66540070	66541523	1453	+	19	66540176	66540225	Mad2l1	mEER3		1.50591	cytoplasm	-516.2	-0.355265	3'UTR
mEER29	Tnfrsf1b	5	chr4	145211602	145213610	2008	-	11	145212326	145212363	Tnfrsf1b	mEER29		0.358132	nuclear	-661	-0.329183	Unannotated	Tnfrsf1b
mEER283	Fam32a	5	chr8	72223527	72223889	362	+	3	72223527	72223539	Fam32a	mEER283		2.22074	cytoplasm	-131	-0.361878	3'UTR
mEER28	Dnase2a	6	chr8	84911162	84911375	213	+	11	84911322	84911373	Dnase2a	mEER28	Dnase2a	0.364297	nuclear	-128.3	-0.602347	3'UTR
mEER279	Tnfrsf11a	2	chr1	105846073	105848056	1983	+	4	105846073	105846080	Tnfrsf11a	mEER279		0.529197	nuclear	-469.7	-0.236863	3'UTR
mEER26	Mmp19	8	chr10	128799374	128800701	1327	+	11	128800563	128800608	Mmp19	mEER26		0.660325	nuclear	-485.2	-0.365637	3'UTR
mEER253	Snx12	2	chrX	101210458	101212785	2327	-	4	101210458	101210485	Snx12	mEER253		3.06726	cytoplasm	-665.7	-0.286076	Introns	Snx12
mEER250	Plbd2	2	chr5	120484020	120484766	746	-	4	120484020	120484051	Plbd2	mEER250		0.2666	nuclear	-278.9	-0.373861	3'UTR	Plbd2
mEER248	Cinp	2	chr12	110874840	110875221	381	-	4	110874840	110874875	Cinp	mEER248		1.73335	cytoplasm	-119.3	-0.313123	Introns	Cinp
mEER231	Pxmp4	3	chr2	154586334	154587168	834	-	4	154586368	154586398	Pxmp4	mEER231	Pxmp4	1.80213	cytoplasm	-395	-0.473621	3'UTR
mEER224	Fadd	3	chr7	144578692	144579675	983	-	4	144578692	144578733	Fadd	mEER224		1.9746	cytoplasm	-323	-0.328586	3'UTR
mEER222	Mob3a	3	chr10	80685971	80686484	513	-	4	80685971	80685987	Mob3a	mEER222				-171.7	-0.334698	3'UTR	Mob3a
mEER221	Tpd52l2	4	chr2	181515405	181518265	2860	+	4	181517806	181517839	Tpd52l2	mEER221		1.85711	cytoplasm	-922	-0.322378	3'UTR	Tpd52l2
mEER219	Nip7	4	chr8	107059407	107060527	1120	+	4	107059456	107059483	Nip7	mEER219		2.34563	cytoplasm	-368.2	-0.32875	3'UTR
mEER216	Ddx3y	4	chrY	1261605	1263789	2184	-	4	1261605	1261635	Ddx3y	mEER216				-501.2	-0.229487	3'UTR	Ddx3y
mEER210	Hnrnpm	5	chr17	33687230	33689832	2602	-	4	33687230	33687276	Hnrnpm	mEER210		2.153	cytoplasm	-905.3	-0.347925	Introns
mEER21	Gnl3l	21	chrX	150983778	150985752	1974	-	11	150985422	150985462	Gnl3l	mEER21		1.57045	cytoplasm	-690.9	-0.35	3'UTR	Gnl3l
mEER209	Atl3	6	chr19	7538099	7538945	846	+	4	7538099	7538132	Atl3	mEER209		1.13217	cytoplasm	-248	-0.293144	3'UTR
mEER199	Lpl	2	chr8	68905293	68905807	514	+	5	68905794	68905807	Lpl	mEER199		0.264978	nuclear	-82.265	-0.160049	3'UTR
mEER197	Cbx1	2	chr11	96807061	96808717	1656	+	5	96807061	96807081	Cbx1	mEER197		1.76139	cytoplasm	-444	-0.268116	3'UTR
mEER185	Entpd1	3	chr19	40740987	40742542	1555	+	5	40740987	40741022	Entpd1	mEER185		0.349199	nuclear	-492.5	-0.31672	Unannotated
mEER182	Gmip	3	chr8	69819113	69821793	2680	+	5	69821404	69821423	Gmip	mEER182		0.982599	nuclear	-971.8	-0.362612	Introns	Gmip
mEER176	Ssh1	3	chr5	113940030	113942339	2309	-	5	113940030	113940053	Ssh1	mEER176		1.80472	cytoplasm	-864	-0.374188	3'UTR
mEER174	Polr3f	4	chr2	144539898	144540494	596	+	5	144539898	144539929	Polr3f	mEER174		1.50416	cytoplasm	-190.5	-0.319631	3'UTR
mEER17	C330018D20Rik	12	chr18	56956417	56957068	651	-	12	56956455	56956504	C330018D20Rik	mEER17		4.29856	cytoplasm	-220.9	-0.339324	3'UTR
mEER168	Snora75	4	chr1	86345903	86347991	2088	-	5	86345903	86345930						-602.8	-0.288697	3'UTR
mEER165	Taok1	4	chr11	77532691	77536054	3363	-	5	77533492	77533508	Taok1	mEER165		1.63506	cytoplasm	-865.3	-0.2573	3'UTR
mEER164	Ift52	5	chr2	163047529	163050081	2552	+	5	163047783	163047804	Ift52	mEER164		2.05643	cytoplasm	-902.9	-0.353801	Unannotated
mEER161	Zyg11b	5	chr4	108230861	108235179	4318	-	5	108232586	108232624	Zyg11b	mEER161		1.949	cytoplasm	-1317.6	-0.305141	3'UTR	Zyg11b
mEER157	Dnajc18	7	chr18	35672424	35674372	1948	-	5	35672800	35672845	Dnajc18	mEER157		1.61485	cytoplasm	-686.5	-0.352413	3'UTR
mEER155	Pofut1	2	chr2	153266085	153266166	81	+	6	153266121	153266166	Pofut1	mEER155		0.283094	nuclear	-12.6	-0.155556	3'UTR
mEER14	Slc7a2	22	chr8	40917762	40920623	2861	+	12	40920141	40920192	Slc7a2	mEER14		0.662296	nuclear	-835.7	-0.292101	3'UTR
mEER137	Ids	3	chrX	70343849	70344717	868	-	6	70344677	70344717	Ids	mEER137		1.95903	cytoplasm	-240.9	-0.277535	3'UTR
mEER13	Qpctl	9	chr7	19139748	19140416	668	-	13	19140363	19140405	Qpctl	mEER13		0.570702	nuclear	-264.8	-0.396407	Unannotated	Qpctl
mEER126	N4bp2l2	6	chr5	150638224	150641361	3137	-	6	150641070	150641110	N4bp2l2	mEER126		1.36366	cytoplasm	-838.4	-0.267262	3'UTR	N4bp2l2
mEER125	Ipp	7	chr4	116538320	116540530	2210	+	6	116538320	116538359	Ipp	mEER125		2.20138	cytoplasm	-677.2	-0.306425	Unannotated
mEER123	Ggps1	7	chr13	14052035	14053588	1553	-	6	14052046	14052093	Ggps1	mEER123		1.30786	cytoplasm	-443.9	-0.285834	3'UTR
mEER120	Hn1l	9	chr17	24939039	24942324	3285	-	6	24940598	24940649	Hn1l	mEER120		3.43071	cytoplasm	-1242.7	-0.378295	Unannotated
mEER117	2810417H13Rik	11	chr9	65902009	65906825	4816	+	6	65905566	65905614	2810417H13Rik	mEER117		2.85246	cytoplasm	-1576.6	-0.327367	Unannotated
mEER11	Sppl2a	14	chr2	126891113	126892919	1806	-	14	126892801	126892851	Sppl2a	mEER11		0.350804	nuclear	-548.3	-0.303599	3'UTR	Sppl2a
mEER108	Abcg4	2	chr9	44292772	44294848	2076	-	7	44294820	44294848	Abcg4	mEER108		44.705	cytoplasm	-697.9	-0.336175	Unannotated
mEER100	Cherp	4	chr8	72480142	72482677	2535	-	7	72480142	72480176	Cherp	mEER100		1.57878	cytoplasm	-884.1	-0.348757	3'UTR
mEER10	2900026A02Rik	14	chr5	113087760	113088056	296	-	14	113087978	113088028	2900026A02Rik	mEER10		1.47202	cytoplasm	-147.7	-0.498986	3'UTR
mEER1	Calcrl	4	chr2	84332536	84332940	404	-	27	84332536	84332587	Calcrl			0.407394	nuclear	-158.5	-0.392327	3'UTR
mEER101	Abhd2	4	chr7	79360742	79360851	109	+	7	79360742	79360774	Abhd2			0.367566	nuclear	-42.5	-0.389908	3'UTR	Abhd2
mEER102	.	3	chr14	19417258	19417871	613	-	7	19417828	19417871						-75.2	-0.122675	Introns
mEER103	Timm17b	3	chrX	7907736	7908155	419	+	7	7907736	7907775	Timm17b			1.70561	cytoplasm	-151.7	-0.362053	3'UTR
mEER104	Trappc10	2	chr10	78186145	78186223	78	-	7	78186145	78186190	Trappc10			1.73617	cytoplasm	-21.7	-0.278205	Unannotated
mEER105	Chpt1	2	chr10	88470150	88470486	336	-	7	88470467	88470486	Chpt1			1.74001	cytoplasm	-80.8	-0.240476	3'UTR
mEER106	Gen1	2	chr12	11239315	11240017	702	-	7	11239315	11239347	Gen1			1.61435	cytoplasm	-171.9	-0.244872	Unannotated
mEER107	Spc24	2	chr9	21755562	21755896	334	-	7	21755849	21755896	Spc24			2.67258	cytoplasm	-123.3	-0.369162	3'UTR
mEER109	Plekho2	2	chr9	65553866	65554186	320	-	7	65553866	65553905	Plekho2			2.33045	cytoplasm	-102.2	-0.319375	Unannotated
mEER110	Mydgf	2	chr17	56175892	56176037	145	-	7	56175892	56175917						-44.1	-0.304138	3'UTR
mEER111	Mgat4a	2	chr1	37442391	37443162	771	-	7	37442391	37442401	Mgat4a			1.16321	cytoplasm	-272.9	-0.353956	3'UTR
mEER112	Ctnnal1	2	chr4	56870135	56870216	81	-	7	56870135	56870179	Ctnnal1			8.941	cytoplasm	-16.9	-0.208642	3'UTR
mEER113	Stap1	2	chr5	86104836	86105532	696	+	7	86105493	86105532	Stap1			1.49017	cytoplasm	-203.1	-0.29181	Unannotated
mEER114	.	2	chr1	171900626	171902361	1735	+	7	171902324	171902361						-411.6	-0.237233	Unannotated
mEER115	Prpf4	2	chr4	62425209	62425277	68	+	7	62425209	62425244	Prpf4			1.11517	cytoplasm	-15.8	-0.232353	3'UTR
mEER116	.	11	chr18	77791358	77792730	1372	-	6	77792418	77792468						-544.7	-0.397012	Unannotated
mEER118	Emd	11	chrX	74258251	74259000	749	+	6	74258324	74258345	Emd			1.53044	cytoplasm	-322.8	-0.430975	Introns
mEER119	D5Ertd579e	9	chr5	36660991	36661514	523	-	6	36661090	36661138	D5Ertd579e			1.47238	cytoplasm	-126.8	-0.242447	Introns
mEER12	Rpa1	11	chr11	75300544	75301041	497	-	13	75300544	75300593	Rpa1			1.63918	cytoplasm	-192.8	-0.387928	3'UTR
mEER121	Milr1	9	chr11	106767785	106771994	4209	+	6	106770044	106770088						-1381.49	-0.328223	Unannotated
mEER122	Zfp809	8	chr9	22241219	22242693	1474	+	6	22242584	22242634	Zfp809			1.02449	cytoplasm	-492	-0.333786	Introns
mEER124	Ankrd40	7	chr11	94335481	94336422	941	+	6	94335481	94335507	Ankrd40			2.21125	cytoplasm	-366.2	-0.38916	Introns
mEER127	A730017L22Rik	5	chr2	130879027	130879405	378	-	6	130879159	130879208	A730017L22Rik			1.7711	cytoplasm	-101.4	-0.268254	Introns
mEER128	Malt1	5	chr18	65477074	65478514	1440	+	6	65478444	65478482	Malt1			0.992485	nuclear	-484.4	-0.336389	3'UTR	Malt1
mEER129	Pex11b	5	chr3	96632457	96632771	314	+	6	96632705	96632729	Pex11b			2.00359	cytoplasm	-140.1	-0.446178	3'UTR	Pex11b
mEER130	Dram2	5	chr3	106576774	106577328	554	+	6	106576774	106576818	Dram2			0.544081	nuclear	-357.3	-0.644946	Unannotated
mEER131	Dffa	5	chr4	149118128	149118817	689	+	6	149118128	149118174	Dffa		Dffa	2.5893	cytoplasm	-308	-0.447025	3'UTR	Dffa
mEER132	Gm14005	4	chr2	128343508	128344271	763	-	6	128343524	128343569	Gm14005			1.86271	cytoplasm	-360.9	-0.473001	Introns
mEER133	Icam1	4	chr9	21019509	21020924	1415	+	6	21020886	21020924	Icam1			0.167245	nuclear	-511.3	-0.361343	Introns	Icam1
mEER134	Ssu72	4	chr4	155715924	155716544	620	+	6	155716477	155716521	Ssu72			1.55296	cytoplasm	-219.365	-0.353815	Introns
mEER135	Pilra	3	chr5	137823013	137823151	138	-	6	137823013	137823058	Pilra			0.336276	nuclear	-37.3	-0.27029	3'UTR	Pilra
mEER136	Rab3d	3	chr9	21907828	21908992	1164	-	6	21907828	21907861	Rab3d			2.45161	cytoplasm	-431.8	-0.370962	3'UTR
mEER138	Pfkfb2	3	chr1	130696177	130697570	1393	-	6	130697525	130697570	Pfkfb2			2.24055	cytoplasm	-457.4	-0.328356	3'UTR
mEER139	AI607873	3	chr1	173739935	173740249	314	-	6	173739978	173740015	AI607873			1.38213	cytoplasm	-78	-0.248408	Introns
mEER140	Fnbp1	3	chr2	31030363	31031072	709	-	6	31030363	31030388	Fnbp1			2.05616	cytoplasm	-237.8	-0.335402	3'UTR	Fnbp1
mEER141	Gm12250	3	chr11	58190534	58190606	72	+	6	58190534	58190582	Gm12250			0.79975	nuclear	-24.5	-0.340278	Unannotated
mEER142	Cd300a	3	chr11	114902411	114903938	1527	+	6	114903873	114903922				0.397154	nuclear	-463.4	-0.303471	3'UTR	Cd300a
mEER143	Haus2	3	chr2	120620261	120620691	430	+	6	120620600	120620643	Haus2			3.20201	cytoplasm	-162.1	-0.376977	3'UTR
mEER144	.	3	chr3	21053219	21053312	93	+	6	21053262	21053312						-26.9	-0.289247	Unannotated
mEER145	Gpatch8	2	chr11	102523312	102523370	58	-	6	102523312	102523351	Gpatch8			1.19202	cytoplasm	-14.7	-0.253448	Introns	Gpatch8
mEER146	Mlkl	2	chr8	111308959	111311043	2084	-	6	111308959	111309007	Mlkl			1.46505	cytoplasm	-625.6	-0.300192	Unannotated	Mlkl
mEER147	.	2	chr1	187239204	187239262	58	-	6	187239204	187239243						-14.7	-0.253448	Unannotated
mEER148	Tcp11l1	2	chr2	104680669	104680778	109	-	6	104680745	104680778	Tcp11l1			1.90058	cytoplasm	-32.4	-0.297248	3'UTR	Tcp11l1
mEER149	Cops2	2	chr2	125831470	125831530	60	-	6	125831470	125831503	Cops2			2.37965	cytoplasm	-9.2	-0.153333	3'UTR
mEER15	Tnfrsf14	19	chr4	154918403	154922022	3619	-	12	154918413	154918464				0.712931	nuclear	-1150.9	-0.318016	Unannotated
mEER150	.	2	chr13	12173349	12173407	58	+	6	12173368	12173407						-14.7	-0.253448	Unannotated
mEER151	Tmem33	2	chr5	67286911	67286971	60	+	6	67286911	67286961	Tmem33			0.557851	nuclear	-8.2	-0.136667	3'UTR
mEER152	Wipi2	2	chr5	142669234	142669292	58	+	6	142669234	142669277	Wipi2			1.21894	cytoplasm	-10.6	-0.182759	3'UTR
mEER153	.	2	chr8	19580554	19580693	139	+	6	19580554	19580571						-42.2	-0.303597	Unannotated
mEER154	Atp6v1h	2	chr1	5102827	5102885	58	+	6	5102846	5102885	Atp6v1h			1.5764	cytoplasm	-14.7	-0.253448	Introns
mEER156	Dennd4b	2	chr3	90281780	90281843	63	+	6	90281800	90281843	Dennd4b			0.869264	nuclear	-15.5	-0.246032	Unannotated	Dennd4b
mEER158	.	7	chr14	19415929	19419378	3449	+	5	19415929	19415943						-527.6	-0.152972	Unannotated
mEER159	.	5	chr7	75776326	75776876	550	-	5	75776837	75776876						-163.9	-0.298	Introns
mEER16	Gla	16	chrX	134588544	134589400	856	-	12	134588544	134588595	Gla			0.446103	nuclear	-366.9	-0.428621	3'UTR
mEER160	Plin2	5	chr4	86653799	86655557	1758	-	5	86653799	86653849	Plin2			2.10122	cytoplasm	-542.7	-0.308703	Introns	Plin2
mEER162	Xpnpep3	5	chr15	81454025	81456906	2881	+	5	81454038	81454085	Xpnpep3			0.979527	nuclear	-903.4	-0.313572	3'UTR
mEER163	.	5	chr16	91080881	91082326	1445	+	5	91080881	91080922						-577	-0.399308	Unannotated
mEER166	Zfp811	4	chr17	32796082	32796591	509	-	5	32796082	32796133	Zfp811					-181.3	-0.356189	Unannotated
mEER167	Rwdd2b	4	chr16	87433888	87434163	275	-	5	87434111	87434152	Rwdd2b			2.61163	cytoplasm	-123.4	-0.448727	3'UTR
mEER169	.	4	chr2	24589164	24589816	652	-	5	24589800	24589816						-250	-0.383436	Unannotated
mEER170	Traf2	4	chr2	25516177	25517831	1654	-	5	25517810	25517831	Traf2		Traf2	1.75727	cytoplasm	-755.2	-0.45659	Unannotated
mEER171	Mir103-1	4	chr11	35786803	35789327	2524	+	5	35787876	35787912						-702.7	-0.278407	3'UTR
mEER172	Tatdn2	4	chr6	113712557	113713223	666	+	5	113713160	113713193	Tatdn2			1.06225	cytoplasm	-209.9	-0.315165	Unannotated	Tatdn2
mEER173	Mapk1ip1l	4	chr14	47319971	47322414	2443	+	5	47319971	47319983	Mapk1ip1l			2.1467	cytoplasm	-758.3	-0.310397	3'UTR	Mapk1ip1l
mEER175	Slc25a11	3	chr11	70643428	70643782	354	-	5	70643428	70643476	Slc25a11			2.83108	cytoplasm	-141.7	-0.400282	Unannotated
mEER177	Iqgap1	3	chr7	80712021	80712397	376	-	5	80712278	80712286	Iqgap1			0.471364	nuclear	-138.1	-0.367287	3'UTR	Iqgap1
mEER178	Trim5	3	chr7	104263663	104264539	876	-	5	104263910	104263946				1.58203	cytoplasm	-220.9	-0.252169	3'UTR	Trim5
mEER179	Zfp799	3	chr17	32818789	32819233	444	-	5	32819181	32819218	Zfp799			1.70931	cytoplasm	-170.6	-0.384234	3'UTR
mEER18	Dnajc1	9	chr2	18214614	18215395	781	-	12	18215344	18215395	Dnajc1			0.46518	nuclear	-345.7	-0.442638	3'UTR
mEER180	Aff4	3	chr11	53389888	53390000	112	+	5	53389888	53389921	Aff4			1.29505	cytoplasm	-37.2	-0.332143	Introns	Aff4
mEER181	Chfr	3	chr5	110130128	110131111	983	+	5	110131075	110131111	Chfr			1.69337	cytoplasm	-323.8	-0.3294	Unannotated	Chfr
mEER183	Slc25a43	3	chrX	36777490	36777582	92	+	5	36777518	36777563				2.0554	cytoplasm	-20.9	-0.227174	Unannotated
mEER184	Deptor	3	chr15	55255226	55255317	91	+	5	55255253	55255301	Deptor			1.9289	cytoplasm	-17.1	-0.187912	3'UTR
mEER186	Cables1	3	chr18	11929865	11929977	112	+	5	11929865	11929898	Cables1			1.003	cytoplasm	-37.2	-0.332143	Introns
mEER187	Noct	3	chr3	51235512	51235591	79	+	5	51235512	51235562						-17.1	-0.216456	Introns	Noct
mEER188	Klhl28	2	chr12	64940762	64940851	89	-	5	64940812	64940851	Klhl28			1.86271	cytoplasm	-18.8	-0.211236	Unannotated
mEER189	Slc35d2	2	chr13	64096635	64096697	62	-	5	64096635	64096670	Slc35d2			0.71476	nuclear	-19.7	-0.317742	3'UTR
mEER19	Slc44a1	9	chr4	53565464	53567211	1747	+	12	53565464	53565515	Slc44a1			0.53389	nuclear	-480.6	-0.2751	3'UTR
mEER190	Nipa1	2	chr7	55977618	55978343	725	-	5	55977618	55977627	Nipa1			0.868211	nuclear	-169.1	-0.233241	3'UTR
mEER191	Letm2	2	chr8	25601099	25601161	62	-	5	25601099	25601146	Letm2			1.41921	cytoplasm	-18.7	-0.301613	Unannotated
mEER192	Rnaseh2a	2	chr8	84957361	84957534	173	-	5	84957361	84957376	Rnaseh2a			2.02706	cytoplasm	-55.9	-0.323121	3'UTR
mEER193	Zcchc14	2	chr8	121598537	121598594	57	-	5	121598584	121598594	Zcchc14			1.13789	cytoplasm	-16.6	-0.291228	Unannotated
mEER194	.	2	chrX	13218092	13218150	58	-	5	13218115	13218150						-15.3	-0.263793	3'UTR
mEER195	Lamp2	2	chrX	38420309	38420503	194	-	5	38420309	38420328	Lamp2			0.275085	nuclear	-46.6	-0.240206	3'UTR
mEER196	Gm13363	2	chr1	30941743	30941801	58	-	5	30941743	30941772						-5.7	-0.0982759	3'UTR
mEER198	.	2	chr6	71124910	71124970	60	+	5	71124910	71124952						-9.3	-0.155	5'UTR
mEER2	Tmem86b	8	chr7	4631900	4631975	75	-	26	4631900	4631951	Tmem86b			1.5686	cytoplasm	-26.9	-0.358667	3'UTR
mEER20	Nudt21	8	chr8	94016626	94017921	1295	-	12	94017270	94017321			Nudt21	26.0779	cytoplasm	-493.6	-0.381158	Unannotated
mEER200	.	2	chr8	129253064	129253340	276	+	5	129253321	129253340						-61	-0.221014	5'UTR
mEER201	Sod2	2	chr17	13016910	13017046	136	+	5	13017006	13017046	Sod2			1.97328	cytoplasm	-37	-0.272059	3'UTR	Sod2
mEER202	Psmd1	2	chr1	86107622	86108115	493	+	5	86107622	86107657	Psmd1			1.06086	cytoplasm	-130.6	-0.264909	Introns
mEER203	Glmp	2	chr3	88330872	88330933	61	+	5	88330872	88330903						-14.1	-0.231148	3'UTR
mEER204	Rbm8a	2	chr3	96624307	96625820	1513	+	5	96624307	96624322	Rbm8a			2.39114	cytoplasm	-517.2	-0.341837	3'UTR	Rbm8a
mEER205	St7l	2	chr3	104928034	104928126	92	+	5	104928080	104928126	St7l			0.361984	nuclear	-25.2	-0.273913	Unannotated
mEER206	Coq3	2	chr4	21911295	21911702	407	+	5	21911666	21911702	Coq3			1.60704	cytoplasm	-117.1	-0.287715	3'UTR
mEER207	Ebna1bp2	2	chr4	118626078	118626143	65	+	5	118626078	118626126	Ebna1bp2			1.21566	cytoplasm	-18.9	-0.290769	3'UTR
mEER208	.	12	chr9	3000473	3004158	3685	-	4	3001349	3001387						-554.5	-0.150475	Introns
mEER211	C920009B18Rik	5	chr10	22311759	22312090	331	+	4	22311759	22311772						-102.3	-0.309063	Introns
mEER212	.	5	chr14	113314718	113315954	1236	+	4	113314772	113314803						-384.8	-0.311327	CDS
mEER213	Ap2m1	5	chr16	20544347	20544869	522	+	4	20544458	20544479	Ap2m1			8.99036	cytoplasm	-266.6	-0.510728	3'UTR
mEER214	Nfe2l1	4	chr11	96815335	96816327	992	-	4	96815335	96815373	Nfe2l1			0.504063	nuclear	-329.4	-0.332056	Unannotated
mEER215	Prokr1	4	chr6	87577525	87578012	487	-	4	87577995	87578012	Prokr1			0.834493	nuclear	-133.1	-0.273306	Unannotated
mEER217	Dtx3l	4	chr16	35926901	35928517	1616	-	4	35926901	35926916	Dtx3l			1.37432	cytoplasm	-482.9	-0.298824	3'UTR	Dtx3l
mEER218	Prrg4	4	chr2	104829608	104831425	1817	-	4	104829608	104829641				1.24181	cytoplasm	-556.9	-0.306494	Unannotated
mEER22	Wdr76	16	chr2	121543251	121544514	1263	+	11	121544258	121544309	Wdr76			1.30015	cytoplasm	-542.1	-0.429216	3'UTR
mEER220	Ms4a4a	4	chr19	11392893	11393100	207	+	4	11393053	11393100						-25.6	-0.123671	Unannotated
mEER223	.	3	chr7	16871502	16872167	665	-	4	16871502	16871533						-284.6	-0.42797	ncRNA
mEER225	.	3	chr9	3024427	3025695	1268	-	4	3024427	3024444						-199.3	-0.157177	Introns
mEER226	Aasdhppt	3	chr9	4292693	4292846	153	-	4	4292693	4292707	Aasdhppt			2.56122	cytoplasm	-35.9	-0.234641	Unannotated
mEER227	.	3	chr9	35305325	35305426	101	-	4	35305377	35305426						-15.6	-0.154455	Unannotated
mEER228	Mir5116	3	chrX	56586270	56587644	1374	-	4	56587587	56587638						-404	-0.294032	3'UTR
mEER229	Coro7	3	chr16	4626314	4626416	102	-	4	4626346	4626386	Coro7			1.26734	cytoplasm	-15.4	-0.15098	3'UTR	Coro7
mEER23	Ankrd28	9	chr14	31700622	31701519	897	-	11	31700622	31700665	Ankrd28			1.70603	cytoplasm	-302	-0.336678	3'UTR	Ankrd28
mEER230	.	3	chr2	28933735	28934284	549	-	4	28934227	28934267						-195.7	-0.356466	3'UTR
mEER232	Gabpb2	3	chr3	95183482	95183941	459	-	4	95183560	95183582	Gabpb2			1.97305	cytoplasm	-212.6	-0.463181	3'UTR	Gabpb2
mEER233	Specc1	3	chr11	62140955	62141446	491	+	4	62141390	62141430	Specc1			1.2576	cytoplasm	-176.8	-0.360081	3'UTR	Specc1
mEER234	Bmp2k	3	chr5	97069205	97069310	105	+	4	97069263	97069310	Bmp2k			1.37905	cytoplasm	-28.5	-0.271429	3'UTR
mEER235	Ddx51	3	chr5	110660825	110660902	77	+	4	110660869	110660902	Ddx51			1.25375	cytoplasm	-19.9	-0.258442	Unannotated
mEER236	Mrps17	3	chr5	129718724	129720805	2081	+	4	129718812	129718827	Mrps17			1.48182	cytoplasm	-731.5	-0.351514	Unannotated
mEER237	Tbxas1	3	chr6	39074852	39075570	718	+	4	39074852	39074863	Tbxas1			0.308576	nuclear	-254	-0.35376	Introns	Tbxas1
mEER238	Mtg1	3	chr7	140135774	140136552	778	+	4	140135774	140135785				2.62159	cytoplasm	-259	-0.332905	Unannotated
mEER239	Sntb2	3	chr8	107017715	107018216	501	+	4	107017715	107017738	Sntb2			1.37466	cytoplasm	-165	-0.329341	Unannotated
mEER24	Nol10	9	chr12	17429597	17429899	302	+	11	17429844	17429895	Nol10			1.36713	cytoplasm	-163.9	-0.542715	3'UTR
mEER240	Atl3	3	chr19	7535239	7535571	332	+	4	7535239	7535286	Atl3			1.13217	cytoplasm	-101.6	-0.306024	3'UTR
mEER241	Hdhd2	3	chr18	76974853	76974955	102	+	4	76974895	76974942	Hdhd2			2.35644	cytoplasm	-24.6	-0.241176	Unannotated
mEER242	Ptpra	3	chr2	130554889	130555929	1040	+	4	130554889	130554934	Ptpra			0.589385	nuclear	-391.2	-0.376154	Unannotated	Ptpra
mEER243	Nras	3	chr3	103066083	103066812	729	+	4	103066790	103066812	Nras			2.44026	cytoplasm	-264.9	-0.363374	3'UTR
mEER244	9930104L06Rik	3	chr4	124943287	124944376	1089	+	4	124944327	124944376	9930104L06Rik			0.867123	nuclear	-416.6	-0.382553	5'UTR
mEER245	Tnfsf13	2	chr11	69682635	69682719	84	-	4	69682635	69682675				0.688663	nuclear	-23.2	-0.27619	3'UTR
mEER246	P4hb	2	chr11	120558931	120559264	333	-	4	120559227	120559264	P4hb			0.350918	nuclear	-106.2	-0.318919	Unannotated	P4hb
mEER247	Atxn3	2	chr12	101919233	101921636	2403	-	4	101921597	101921636	Atxn3			1.91593	cytoplasm	-628.9	-0.261715	3'UTR	Atxn3
mEER249	Rad17	2	chr13	100637399	100637659	260	-	4	100637638	100637659	Rad17			1.89658	cytoplasm	-109.9	-0.422692	Introns
mEER25	Tulp4	9	chr17	6122583	6123140	557	+	11	6122607	6122656	Tulp4			2.0088	cytoplasm	-226.6	-0.406822	Introns
mEER251	Gga2	2	chr7	121987642	121988255	613	-	4	121987642	121987651	Gga2			2.22794	cytoplasm	-255.1	-0.41615	3'UTR	Gga2
mEER252	Ibtk	2	chr9	85746358	85746421	63	-	4	85746358	85746395	Ibtk			1.61753	cytoplasm	-16.1	-0.255556	Introns
mEER254	2610002M06Rik	2	chrX	107787072	107787140	68	-	4	107787072	107787094	2610002M06Rik			2.36246	cytoplasm	-11.5	-0.169118	3'UTR
mEER255	.	2	chr17	39847402	39847454	52	-	4	39847402	39847428						-10.8	-0.207692	Unannotated
mEER256	Fbxl17	2	chr17	63052529	63052628	99	-	4	63052609	63052628	Fbxl17			2.52108	cytoplasm	-21.5	-0.217172	Unannotated
mEER257	Heatr5b	2	chr17	78749279	78749354	75	-	4	78749279	78749314	Heatr5b			3.13719	cytoplasm	-19.1	-0.254667	Unannotated
mEER258	.	2	chr16	35981762	35981824	62	-	4	35981762	35981801						-8.3	-0.133871	ncRNA
mEER259	.	2	chr1	46075988	46076047	59	-	4	46075988	46076015						-5.8	-0.0983051	Unannotated
mEER260	Aldoart1	2	chr4	72851978	72852047	69	-	4	72852006	72852047				3.17396	cytoplasm	-13.4	-0.194203	CDS
mEER261	Dlg4	2	chr11	70032083	70034452	2369	+	4	70032083	70032124	Dlg4			1.90472	cytoplasm	-879.6	-0.371296	Introns
mEER262	LOC666331	2	chr11	101605621	101605701	80	+	4	101605657	101605701						-15.8	-0.1975	Unannotated
mEER263	.	2	chr12	3109993	3110048	55	+	4	3109993	3110044						-2.2	-0.04	Unannotated
mEER264	.	2	chr13	9834437	9834493	56	+	4	9834437	9834488						-22.1	-0.394643	Unannotated
mEER265	Bicd2	2	chr13	49385807	49386166	359	+	4	49385807	49385833	Bicd2			1.61645	cytoplasm	-99.9	-0.278273	3'UTR
mEER266	A430033K04Rik	2	chr5	138649448	138649842	394	+	4	138649448	138649459	A430033K04Rik			0.96347	nuclear	-136.2	-0.345685	Unannotated
mEER267	Mkln1	2	chr6	31512150	31512300	150	+	4	31512150	31512177	Mkln1			1.11966	cytoplasm	-34.6	-0.230667	3'UTR	Mkln1
mEER268	.	2	chrY	1048546	1048606	60	+	4	1048546	1048565						-7.6	-0.126667	Unannotated
mEER269	Gab2	2	chr7	97098466	97098942	476	+	4	97098466	97098476	Gab2			1.10796	cytoplasm	-147.4	-0.309664	Introns
mEER27	Ovca2	7	chr11	75176323	75177471	1148	-	11	75177350	75177400	Ovca2			1.87019	cytoplasm	-390.1	-0.339808	3'UTR
mEER270	Snora30	2	chr7	127526651	127526725	74	+	4	127526651	127526680	Snora30			0.0752609	nuclear	-14.8	-0.2	Introns
mEER271	.	2	chr8	5640756	5640890	134	+	4	5640852	5640890						-32.7	-0.24403	CDS
mEER272	Nrp1	2	chr8	128504170	128505010	840	+	4	128505006	128505010	Nrp1			0.171009	nuclear	-181.8	-0.216429	3'UTR
mEER273	.	2	chr9	56223683	56223739	56	+	4	56223683	56223734						-22.1	-0.394643	Unannotated
mEER274	Limd1	2	chr9	123520874	123520968	94	+	4	123520917	123520968	Limd1			1.33454	cytoplasm	-36.2	-0.385106	3'UTR	Limd1
mEER275	.	2	chrX	80458231	80458347	116	+	4	80458334	80458347						-23.7	-0.20431	5'UTR
mEER276	Lrrc58	2	chr16	37883379	37883571	192	+	4	37883379	37883413	Lrrc58			2.33802	cytoplasm	-53.6	-0.279167	3'UTR
mEER277	Ap5b1	2	chr19	5571682	5572372	690	+	4	5571682	5571713	Ap5b1					-373.7	-0.541594	Unannotated	Ap5b1
mEER278	1810009A15Rik	2	chr19	8890888	8891121	233	+	4	8890888	8890927				1.43878	cytoplasm	-89.5	-0.38412	Unannotated
mEER280	Mapkap1	2	chr2	34565478	34565637	159	+	4	34565478	34565497	Mapkap1			1.70524	cytoplasm	-37.4	-0.23522	Introns	Mapkap1
mEER281	Hnrnpa3	2	chr2	75665801	75665917	116	+	4	75665904	75665917	Hnrnpa3			2.14211	cytoplasm	-23.7	-0.20431	3'UTR
mEER282	AW011738	2	chr4	156204982	156205038	56	+	4	156204982	156205022	AW011738			1.86271	cytoplasm	-8.9	-0.158929	3'UTR
mEER284	Trim65	3	chr11	116122773	116122845	72	-	3	116122773	116122824	Trim65			1.97986	cytoplasm	-10.1	-0.140278	3'UTR
mEER285	Mir3098	3	chr2	131322102	131322189	87	-	3	131322102	131322139	Mir3098					-11.1	-0.127586	3'UTR
mEER286	.	3	chr3	88576614	88576840	226	-	3	88576614	88576650						-55.6	-0.246018	CDS
mEER287	Nmnat1	3	chr4	149468177	149468262	85	-	3	149468177	149468214	Nmnat1			2.19704	cytoplasm	-28.7	-0.337647	3'UTR	Nmnat1
mEER288	Cmpk2	3	chr12	26482722	26483334	612	+	3	26482722	26482738	Cmpk2			1.24924	cytoplasm	-159.8	-0.261111	Unannotated	Cmpk2
mEER289	Ttc33	3	chr15	5218482	5219113	631	+	3	5218482	5218529	Ttc33			1.93874	cytoplasm	-191.8	-0.303962	Unannotated
mEER290	Cd84	3	chr1	171892014	171892336	322	+	3	171892014	171892042	Cd84			0.238917	nuclear	-74.1	-0.230124	Unannotated	Cd84
mEER291	Aida	3	chr1	183326254	183326319	65	+	3	183326254	183326285	Aida			2.37416	cytoplasm	-11.6	-0.178462	Unannotated
mEER292	4933430I17Rik	3	chr4	62550960	62551016	56	+	3	62550960	62550986				1.55226	cytoplasm	-15.4	-0.275	Unannotated
mEER293	.	2	chr11	40673000	40673069	69	-	3	40673000	40673040						-19.7	-0.285507	3'UTR
mEER294	.	2	chr12	3341924	3343929	2005	-	3	3341924	3341960						-608.7	-0.303591	Unannotated
mEER295	Zfp874b	2	chr13	67473025	67473372	347	-	3	67473025	67473048	Zfp874b			1.64239	cytoplasm	-161.8	-0.466282	3'UTR
mEER296	.	2	chr13	111882595	111883413	818	-	3	111882595	111882603						-276.1	-0.337531	3'UTR
mEER297	Ptpn12	2	chr5	21009434	21011197	1763	-	3	21009434	21009439	Ptpn12			1.96925	cytoplasm	-536.8	-0.304481	Introns	Ptpn12
mEER298	.	2	chr5	22725372	22725425	53	-	3	22725372	22725412						-6.1	-0.115094	Unannotated
mEER299	Rad18	2	chr6	112619553	112619624	71	-	3	112619553	112619566	Rad18			2.33077	cytoplasm	-25.8	-0.36338	Unannotated
mEER30	Trim12c	4	chr7	104339029	104339306	277	-	11	104339262	104339306	Trim12c			1.19706	cytoplasm	-74	-0.267148	3'UTR
mEER300	.	2	chr7	100760622	100761353	731	-	3	100760622	100760651						-253	-0.346101	3'UTR
mEER301	Ddx19a	2	chr8	110974605	110974689	84	-	3	110974605	110974646	Ddx19a			2.61117	cytoplasm	-10.1	-0.120238	Unannotated
mEER302	.	2	chr9	3019031	3019092	61	-	3	3019031	3019080						-6.2	-0.101639	Introns
mEER303	.	2	chr9	3029216	3029721	505	-	3	3029216	3029225						-75.5	-0.149505	Introns
mEER304	.	2	chrX	81821823	81822114	291	-	3	81821823	81821837						-75.3	-0.258763	3'UTR
mEER306	.	2	chr15	5120698	5120849	151	-	3	5120698	5120739						-34.6	-0.229139	CDS
mEER307	.	2	chr19	50030435	50030491	56	-	3	50030435	50030458						-14.3	-0.255357	CDS
mEER308	Pid1	2	chr1	84101959	84102673	714	-	3	84101959	84101967	Pid1			3.39711	cytoplasm	-232	-0.32493	Introns
mEER309	.	2	chr1	181254695	181254749	54	-	3	181254695	181254740						-6.8	-0.125926	Unannotated
mEER31	Sod2	3	chr17	13019562	13020019	457	+	11	13019971	13020019	Sod2			1.97328	cytoplasm	-93.8	-0.205252	Unannotated	Sod2
mEER310	.	2	chr2	22588816	22588963	147	-	3	22588816	22588820						-28.9	-0.196599	3'UTR
mEER311	Rab14	2	chr2	35180716	35181087	371	-	3	35180716	35180731	Rab14			2.09007	cytoplasm	-111.5	-0.300539	3'UTR
mEER312	.	2	chr2	83353437	83353600	163	-	3	83353437	83353452						-38.7	-0.237423	3'UTR
mEER313	A730017L22Rik	2	chr2	130872755	130872823	68	-	3	130872755	130872783	A730017L22Rik			1.7711	cytoplasm	-16.9	-0.248529	Introns
mEER314	.	2	chr4	117728388	117729214	826	-	3	117728388	117728422						-235.7	-0.285351	3'UTR
mEER315	Eif4enif1	2	chr11	3220585	3220649	64	+	3	3220585	3220599	Eif4enif1			1.60465	cytoplasm	-8.1	-0.126562	Introns
mEER316	Dhrs7b	2	chr11	60858882	60858945	63	+	3	60858882	60858901	Dhrs7b			0.514696	nuclear	-16.9	-0.268254	3'UTR
mEER317	D030028A08Rik	2	chr11	96964961	96965069	108	+	3	96964961	96964973				1.86271	cytoplasm	-21.7	-0.200926	5'UTR
mEER318	Tecpr2	2	chr12	110898453	110898508	55	+	3	110898453	110898502	Tecpr2			0.721251	nuclear	-10.6	-0.192727	Introns
mEER319	Idi1	2	chr13	8890520	8892140	1620	+	3	8890520	8890544	Idi1			3.20386	cytoplasm	-431.8	-0.266543	3'UTR
mEER320	.	2	chr13	51785737	51785854	117	+	3	51785737	51785784						-29.9	-0.255556	Unannotated
mEER322	Malsu1	2	chr6	49069197	49069763	566	+	3	49069197	49069233	Malsu1					-152.8	-0.269965	Unannotated
mEER323	1600014C10Rik	2	chr7	38190490	38190928	438	+	3	38190490	38190522	1600014C10Rik			2.04493	cytoplasm	-154.2	-0.352055	Introns
mEER324	.	2	chr7	46942071	46942161	90	+	3	46942071	46942095						-24.7	-0.274444	Unannotated
mEER325	.	2	chr7	101557853	101557921	68	+	3	101557853	101557883						-13.6	-0.2	Unannotated
mEER326	Alkbh8	2	chr9	3387637	3387695	58	+	3	3387637	3387646	Alkbh8			1.99576	cytoplasm	-4.4	-0.0758621	Unannotated
mEER327	Lars2	2	chr9	123461879	123461932	53	+	3	123461879	123461894	Lars2					-10	-0.188679	3'UTR
mEER328	Pbdc1	2	chrX	105083712	105083767	55	+	3	105083712	105083731	Pbdc1					-11.2	-0.203636	3'UTR
mEER329	Atp7a	2	chrX	106126583	106126662	79	+	3	106126583	106126626	Atp7a			0.35057	nuclear	-23.9	-0.302532	Unannotated
mEER330	Pgk1	2	chrX	106203232	106205439	2207	+	3	106203232	106203235				2.80049	cytoplasm	-618.3	-0.280154	Unannotated	Pgk1
mEER331	.	2	chrX	141980739	141980791	52	+	3	141980739	141980788						-10.7	-0.205769	5'UTR
mEER332	Gm10863	2	chr15	79218430	79218595	165	+	3	79218430	79218455				2.19142	cytoplasm	-96	-0.581818	Introns
mEER334	.	2	chr17	70963740	70963792	52	+	3	70963740	70963791						-11.5	-0.221154	Introns
mEER335	Bmpr2	2	chr1	59873115	59874223	1108	+	3	59873115	59873142	Bmpr2			0.458743	nuclear	-288.8	-0.26065	Unannotated	Bmpr2
mEER336	.	2	chr1	167340250	167340375	125	+	3	167340250	167340269						-39.7	-0.3176	Unannotated
mEER337	Cd244	2	chr1	171585221	171586190	969	+	3	171585221	171585229	Cd244			0.961398	nuclear	-289.2	-0.298452	Unannotated
mEER338	Slamf9	2	chr1	172477612	172477728	116	+	3	172477612	172477654	Slamf9			0.413935	nuclear	-29.6	-0.255172	Introns
mEER339	.	2	chr18	67698232	67698322	90	+	3	67698232	67698256						-24.7	-0.274444	Unannotated
mEER341	Atp11b	2	chr3	35808054	35808151	97	+	3	35808054	35808068	Atp11b			0.440794	nuclear	-20.9	-0.215464	Introns
mEER35	Dhrs9	13	chr2	69403524	69403764	240	+	10	69403705	69403756				0.69807	nuclear	-102.5	-0.427083	3'UTR
mEER37	Gab3	8	chrX	74987894	74988248	354	-	10	74987894	74987940	Gab3			1.70824	cytoplasm	-185.8	-0.524859	Introns
mEER39	Usp45	8	chr4	21834527	21836641	2114	+	10	21834778	21834819	Usp45			1.41942	cytoplasm	-606	-0.28666	3'UTR
mEER4	Gpnmb	5	chr6	49060547	49061145	598	+	18	49061108	49061145	Gpnmb					-250.8	-0.419398	Unannotated
mEER40	Tmem69	7	chr4	116552173	116552923	750	-	10	116552769	116552817	Tmem69			0.82389	nuclear	-358.5	-0.478	3'UTR
mEER42	.	5	chr5	53530441	53531063	622	-	10	53530989	53531040						-185.5	-0.298232	Unannotated
mEER43	Exoc8	5	chr8	124893344	124894190	846	-	10	124893853	124893896	Exoc8			1.76348	cytoplasm	-301.6	-0.356501	3'UTR
mEER45	Lactb2	3	chr1	13624979	13625755	776	-	10	13625711	13625755	Lactb2			2.17606	cytoplasm	-221.8	-0.285825	3'UTR
mEER46	.	18	chr11	97644500	97646495	1995	-	9	97644573	97644620						-761.2	-0.381554	3'UTR
mEER47	Oip5	15	chr2	119608818	119610083	1265	-	9	119609305	119609348				1.99576	cytoplasm	-484.1	-0.382688	Unannotated
mEER48	Eapp	13	chr12	54671685	54672416	731	-	9	54671707	54671758	Eapp			2.5556	cytoplasm	-329.8	-0.451163	3'UTR
mEER49	.	13	chr4	145275546	145278771	3225	+	9	145275586	145275625						-1178.7	-0.365488	Unannotated
mEER52	Gbgt1	11	chr2	28506184	28507011	827	+	9	28506945	28506995	Gbgt1			0.443502	nuclear	-382.5	-0.462515	Unannotated	Gbgt1
mEER53	Xrn1	10	chr9	96053573	96057248	3675	+	9	96057201	96057248	Xrn1			0.924489	nuclear	-1182.5	-0.321769	Unannotated	Xrn1
mEER54	Aif1	8	chr17	35169640	35170792	1152	-	9	35170687	35170735	Aif1			2.46405	cytoplasm	-429.5	-0.37283	Unannotated
mEER55	Trove2	8	chr1	143755303	143755855	552	-	9	143755339	143755383	Trove2			1.62066	cytoplasm	-211.2	-0.382609	3'UTR
mEER56	Sfxn2	8	chr19	46595158	46596387	1229	+	9	46596342	46596387	Sfxn2			1.08376	cytoplasm	-465.1	-0.378438	3'UTR
mEER57	Zbtb6	7	chr2	37425814	37425955	141	-	9	37425814	37425851	Zbtb6			1.96562	cytoplasm	-26.4	-0.187234	3'UTR
mEER59	Mdc1	5	chr17	35857733	35858957	1224	+	9	35858600	35858643	Mdc1			0.929945	nuclear	-508	-0.415033	3'UTR
mEER6	Rnf168	15	chr16	32299797	32300361	564	+	16	32300222	32300268	Rnf168			1.34159	cytoplasm	-287.3	-0.509397	3'UTR
mEER60	9930104L06Rik	3	chr4	124938941	124939022	81	+	9	124938941	124938986	9930104L06Rik			0.867123	nuclear	-17.3	-0.21358	Introns
mEER62	Sp3	2	chr2	72937183	72937237	54	-	9	72937183	72937234	Sp3			1.61751	cytoplasm	-3.1	-0.0574074	3'UTR	Sp3
mEER64	Ccpg1	2	chr9	73013521	73013574	53	+	9	73013521	73013570	Ccpg1			0.221129	nuclear	-23	-0.433962	3'UTR
mEER66	Slc35e2	18	chr4	155620812	155622378	1566	+	8	155621025	155621070	Slc35e2			0.793635	nuclear	-661.1	-0.422158	3'UTR	Slc35e2
mEER67	.	15	chr7	34391670	34395354	3684	+	8	34391749	34391788						-1218.7	-0.330809	Introns
mEER68	Iws1	10	chr18	32102499	32102968	469	+	8	32102499	32102545	Iws1			1.08029	cytoplasm	-209.4	-0.446482	3'UTR
mEER70	Sass6	9	chr3	116629266	116629655	389	+	8	116629335	116629378	Sass6		Sass6	1.36059	cytoplasm	-165.6	-0.425707	3'UTR
mEER75	Coq5	6	chr5	115285494	115287265	1771	+	8	115285605	115285652	Coq5			1.9317	cytoplasm	-599.7	-0.338622	Introns
mEER76	Bri3bp	6	chr5	125456602	125457531	929	+	8	125457464	125457508	Bri3bp			0.532202	nuclear	-354.7	-0.381808	3'UTR	Bri3bp
mEER77	Zfp626	6	chr7	27821530	27822018	488	+	8	27821581	27821627				1.52403	cytoplasm	-232.8	-0.477049	Unannotated
mEER78	Casc5	6	chr2	119104342	119104959	617	+	8	119104416	119104462	Casc5			0.938765	nuclear	-294.8	-0.477796	3'UTR
mEER79	Kcnk6	5	chr7	29222817	29223145	328	-	8	29222817	29222863	Kcnk6			0.373636	nuclear	-140.1	-0.427134	3'UTR	Kcnk6
mEER80	.	5	chr9	3006785	3006903	118	-	8	3006851	3006890						-9.6	-0.0813559	Introns
mEER81	Ticam2	5	chr18	46556890	46557214	324	-	8	46557118	46557166				2.46785	cytoplasm	-160.9	-0.496605	Unannotated
mEER82	Zbtb7b	4	chr3	89379216	89379279	63	-	8	89379231	89379279	Zbtb7b			2.30637	cytoplasm	-26.3	-0.41746	3'UTR
mEER83	Rbbp4	4	chr4	129309877	129310010	133	-	8	129309956	129310001	Rbbp4			2.52816	cytoplasm	-58.3	-0.438346	3'UTR	Rbbp4
mEER84	Ppp1r15b	4	chr1	133137323	133138030	707	+	8	133137533	133137583	Ppp1r15b			0.581938	nuclear	-231.1	-0.326874	3'UTR	Ppp1r15b
mEER85	Dclre1c	4	chr2	3460311	3461123	812	+	8	3460355	3460400	Dclre1c			0.700419	nuclear	-209.2	-0.257635	3'UTR	Dclre1c
mEER86	Fam63b	3	chr9	70602203	70602293	90	-	8	70602203	70602254	Fam63b			1.86271	cytoplasm	-21.7	-0.241111	3'UTR
mEER88	.	3	chr4	138014075	138014174	99	-	8	138014125	138014174						-20.6	-0.208081	Unannotated
mEER89	D5Ertd579e	16	chr5	36630482	36630780	298	-	7	36630543	36630587	D5Ertd579e			1.47238	cytoplasm	-71.3	-0.239262	Introns
mEER9	Prkcb	4	chr7	122629012	122629096	84	+	15	122629012	122629054	Prkcb			1.62564	cytoplasm	-6.5	-0.077381	Introns
mEER92	Cd48	10	chr1	171701953	171703485	1532	+	7	171702002	171702042	Cd48			0.342269	nuclear	-503.8	-0.328851	Introns
mEER93	Tmed9	8	chr13	55597856	55598697	841	+	7	55598646	55598697	Tmed9			0.343491	nuclear	-397	-0.472057	Unannotated
mEER94	Tbc1d24	6	chr17	24176104	24178395	2291	-	7	24178308	24178357	Tbc1d24			1.70444	cytoplasm	-743.2	-0.3244	3'UTR
mEER95	Ms4a6d	5	chr19	11585007	11586198	1191	-	7	11586012	11586054	Ms4a6d			0.455412	nuclear	-348	-0.292191	Unannotated
mEER97	Aaed1	4	chr13	64290156	64291065	909	-	7	64290301	64290351	Aaed1					-320.8	-0.352915	Unannotated
mEER98	Gm21188	4	chr13	120042557	120043731	1174	-	7	120042557	120042608						-381.6	-0.325043	Unannotated

## Sheet: Column Info
Supplemental Table 2. Legend
Column	Description	Extra Details
EER Name	The name given to the EER	mouse EER (mEER)
Associated Gene	Any gene associated with the EER within 5000 nt	Created using Bedtools slopBed of EER bed file with -b 5000
#Windows	Number of windows identified with ≥3 editing sites by the EER pipeline
Chr	chromosome of EER
Start	start of EER
Stop	stop of EER
Length	length of EER in nucleotides
Strand	strand of EER
BW_#Obs	Number of editing sites in best 50 nt window of EER
BW_Start	start of best window of editing
BW_Stop	stop of best window of editing
PolyA in EAG	Intersection of Alternative PolyA sites from APADB GenXPro Bioinformatics Service with EAGs	http://tools.genxpro.net/apadb/
PolyA in EER	Intersection of Alternative PolyA sites from APADB GenXPro Bioinformatics Service with EERs	http://tools.genxpro.net/apadb/
Osenberg	Intersection of EAGs that were predicted to be cleaved by Osenberg et al. 2009
Smale C/N Ratio	The ratio of reads from unstimulated BMDMs in the cytoplasm/nucleus	Bhatt et al. 2012
Smale Localization	Descriptor of the above column. Negative value indicates nuclear, positive Cytoplasmic skewing.	Bhatt et al. 2012
ΔG	Folding Free Energy for entire EER sequence
ΔG/nt	Folding Free Energy of EER divided by length of EER
Primary Annotation	Location of most predominant gene annotation as calculated per base by Bedtools annotatebed
Conserved hEAG	mEAGs containing EER in orthologous human gene	mouse EER-associated gene (mEAG)
