# Supplementary material for: Identification of the long, edited dsRNAome of LPS-stimulated immune cells
Source: HighWire-hosted journal article supplement (doi:10.1101/gr.203992.116), 2016-04-21
Supplement: Supplemental_Table_S4.xlsx [file Supplemental_Table_S4.xlsx]

## Sheet: Sheet1
Supplemental Table S4. mEER Gene Ontology
GO Term	Description	P-value	FDR q-value	Enrichment (N, B, n, b)
GO:0001913	T cell mediated cytotoxicity	0.000686	1	16.33 (11916,11,199,3)
GO:0003085	negative regulation of systemic arterial blood pressure	0.000686	1	16.33 (11916,11,199,3)
GO:2001170	negative regulation of ATP biosynthetic process	0.000823	1	39.92 (11916,3,199,2)
GO:0051541	elastin metabolic process	0.000823	1	39.92 (11916,3,199,2)
GO:0071360	cellular response to exogenous dsRNA	0.000903	1	14.97 (11916,12,199,3)
N - is the total number of genes
B - is the total number of genes associated with a specific GO term
n - is the number of genes in the top of the user's input list or in the target set when appropriate
b - is the number of genes in the intersection
Enrichment = (b/n) / (B/N)
