# Supplementary material for: Identification of the long, edited dsRNAome of LPS-stimulated immune cells
Source: HighWire-hosted journal article supplement (doi:10.1101/gr.203992.116), 2016-04-21
Supplement: Supplemental_Table_S5.xlsx [file Supplemental_Table_S5.xlsx]

## Sheet: hEER GO terms
Supplemental Table S5. hEER Gene Ontology
GO term	Description	P-value	FDR q-value	Enrichment (N, B, n, b)
GO:0045088	regulation of innate immune response	2.69e-12	2.86e-09	2.15 (13931,334,1646,85)
GO:0002252	immune effector process	6.95e-11	4.03e-08	2.04 (13931,348,1646,84)
GO:0019221	cytokine-mediated signaling pathway	5.43e-10	2.39e-07	2.00 (13931,338,1646,80)
GO:0009615	response to virus	2.52e-09	8.94e-07	2.31 (13931,194,1646,53)
GO:0045089	positive regulation of innate immune response	3.98e-09	1.33e-06	2.06 (13931,275,1646,67)
GO:0043122	regulation of I-kappaB kinase/NF-kappaB signaling	2.56e-08	7.6e-06	2.16 (13931,212,1646,54)
GO:0032479	regulation of type I interferon production	1.13e-07	2.78e-05	2.53 (13931,117,1646,35)
GO:0002218	activation of innate immune response	1.25e-07	3.02e-05	2.02 (13931,239,1646,57)
GO:0002221	pattern recognition receptor signaling pathway	1.93e-07	4.23e-05	2.38 (13931,135,1646,38)
GO:0060333	interferon-gamma-mediated signaling pathway	2.36e-07	5.01e-05	2.98 (13931,71,1646,25)
GO:2000116	regulation of cysteine-type endopeptidase activity	3.67e-07	6.99e-05	2.12 (13931,188,1646,47)
GO:0051607	defense response to virus	5.38e-07	9.95e-05	2.39 (13931,124,1646,35)
GO:0050792	regulation of viral process	5.74e-07	0.000105	2.17 (13931,168,1646,43)
GO:0019058	viral life cycle	6.46e-07	0.000113	2.28 (13931,141,1646,38)
GO:0043903	regulation of symbiosis, encompassing mutualism through parasitism	1.29e-06	0.000206	2.05 (13931,190,1646,46)
GO:1903900	regulation of viral life cycle	1.7e-06	0.000261	2.13 (13931,163,1646,41)
GO:0043281	regulation of cysteine-type endopeptidase activity involved in apoptotic process	2.57e-06	0.000382	2.06 (13931,177,1646,43)
GO:0032480	negative regulation of type I interferon production	3.22e-06	0.000461	3.35 (13931,43,1646,17)
GO:0001818	negative regulation of cytokine production	3.52e-06	0.000477	2.03 (13931,179,1646,43)
GO:0043123	positive regulation of I-kappaB kinase/NF-kappaB signaling	4.37e-06	0.000574	2.08 (13931,163,1646,40)
GO:0072599	establishment of protein localization to endoplasmic reticulum	5.53e-06	0.000699	2.30 (13931,114,1646,31)
GO:0045047	protein targeting to ER	7.31e-06	0.00088	2.31 (13931,110,1646,30)
GO:0006613	cotranslational protein targeting to membrane	1.43e-05	0.00155	2.27 (13931,108,1646,29)
GO:0002224	toll-like receptor signaling pathway	1.43e-05	0.00156	2.20 (13931,119,1646,31)
GO:0060759	regulation of response to cytokine stimulus	2.06e-05	0.0021	2.31 (13931,99,1646,27)
GO:0019083	viral transcription	2.09e-05	0.00212	2.23 (13931,110,1646,29)
GO:0043300	regulation of leukocyte degranulation	2.19e-05	0.00219	3.55 (13931,31,1646,13)
GO:0097202	activation of cysteine-type endopeptidase activity	2.23e-05	0.0022	2.34 (13931,94,1646,26)
GO:0050851	antigen receptor-mediated signaling pathway	2.3e-05	0.00224	2.26 (13931,105,1646,28)
GO:0043901	negative regulation of multi-organism process	2.44e-05	0.0023	2.15 (13931,122,1646,31)
GO:0006614	SRP-dependent cotranslational protein targeting to membrane	2.78e-05	0.00258	2.24 (13931,106,1646,28)
GO:0002703	regulation of leukocyte mediated immunity	2.89e-05	0.00267	2.13 (13931,123,1646,31)
GO:0050852	T cell receptor signaling pathway	3.33e-05	0.00306	2.43 (13931,80,1646,23)
GO:0070972	protein localization to endoplasmic reticulum	3.85e-05	0.0035	2.13 (13931,119,1646,30)
GO:0048525	negative regulation of viral process	4.37e-05	0.0039	2.45 (13931,76,1646,22)
GO:0002250	adaptive immune response	4.48e-05	0.00394	2.01 (13931,143,1646,34)
GO:0060337	type I interferon signaling pathway	4.67e-05	0.00405	2.72 (13931,56,1646,18)
GO:2000106	regulation of leukocyte apoptotic process	4.69e-05	0.00404	2.56 (13931,66,1646,20)
GO:0002753	cytoplasmic pattern recognition receptor signaling pathway	4.85e-05	0.00415	3.33 (13931,33,1646,13)
GO:0032648	regulation of interferon-beta production	5.02e-05	0.00426	3.02 (13931,42,1646,15)
GO:0001959	regulation of cytokine-mediated signaling pathway	5.36e-05	0.00446	2.28 (13931,93,1646,25)
GO:0006919	activation of cysteine-type endopeptidase activity involved in apoptotic process	5.83e-05	0.0048	2.31 (13931,88,1646,24)
GO:1902041	regulation of extrinsic apoptotic signaling pathway via death domain receptors	6.87e-05	0.00554	2.95 (13931,43,1646,15)
GO:2001056	positive regulation of cysteine-type endopeptidase activity	7.46e-05	0.00591	2.06 (13931,123,1646,30)
GO:0002443	leukocyte mediated immunity	7.75e-05	0.00606	2.55 (13931,63,1646,19)
GO:0034142	toll-like receptor 4 signaling pathway	7.83e-05	0.00609	2.23 (13931,95,1646,25)
GO:0033003	regulation of mast cell activation	7.95e-05	0.00614	3.39 (13931,30,1646,12)
GO:1903901	negative regulation of viral life cycle	8.9e-05	0.00676	2.40 (13931,74,1646,21)
GO:0070228	regulation of lymphocyte apoptotic process	9.3e-05	0.00697	2.89 (13931,44,1646,15)
GO:1903305	regulation of regulated secretory pathway	9.96e-05	0.00743	3.14 (13931,35,1646,13)
GO:0002698	negative regulation of immune effector process	0.000102	0.00754	2.33 (13931,80,1646,22)
GO:2000117	negative regulation of cysteine-type endopeptidase activity	0.00011	0.00793	2.37 (13931,75,1646,21)
GO:0002886	regulation of myeloid leukocyte mediated immunity	0.000116	0.00825	3.28 (13931,31,1646,12)
GO:0035872	nucleotide-binding domain, leucine rich repeat containing receptor signaling pathway	0.000124	0.00862	2.82 (13931,45,1646,15)
GO:0072673	lamellipodium morphogenesis	0.000124	0.00863	7.05 (13931,6,1646,5)
GO:0031638	zymogen activation	0.000143	0.00949	2.12 (13931,104,1646,26)
GO:0031348	negative regulation of defense response	0.000143	0.00954	2.12 (13931,104,1646,26)
GO:0002446	neutrophil mediated immunity	0.000146	0.00968	4.94 (13931,12,1646,7)
GO:0043154	negative regulation of cysteine-type endopeptidase activity involved in apoptotic process	0.000179	0.0114	2.35 (13931,72,1646,20)
GO:0051092	positive regulation of NF-kappaB transcription factor activity	0.000181	0.0114	2.03 (13931,117,1646,28)
GO:0045071	negative regulation of viral genome replication	0.000208	0.0127	2.82 (13931,42,1646,14)
GO:0032675	regulation of interleukin-6 production	0.000245	0.0145	2.25 (13931,79,1646,21)
GO:0060338	regulation of type I interferon-mediated signaling pathway	0.000275	0.0162	3.21 (13931,29,1646,11)
GO:0031295	T cell costimulation	0.000416	0.023	2.40 (13931,60,1646,17)
GO:0031294	lymphocyte costimulation	0.000416	0.0231	2.40 (13931,60,1646,17)
GO:0032722	positive regulation of chemokine production	0.000436	0.024	2.90 (13931,35,1646,12)
GO:0002761	regulation of myeloid leukocyte differentiation	0.000451	0.0247	2.12 (13931,88,1646,22)
GO:0002444	myeloid leukocyte mediated immunity	0.000512	0.0273	4.23 (13931,14,1646,7)
GO:0032651	regulation of interleukin-1 beta production	0.000585	0.0303	2.82 (13931,36,1646,12)
GO:0007029	endoplasmic reticulum organization	0.00065	0.0328	3.13 (13931,27,1646,10)
GO:0032088	negative regulation of NF-kappaB transcription factor activity	0.000682	0.0339	2.38 (13931,57,1646,16)
GO:0060760	positive regulation of response to cytokine stimulus	0.000733	0.036	2.91 (13931,32,1646,11)
GO:0033006	regulation of mast cell activation involved in immune response	0.000761	0.037	3.31 (13931,23,1646,9)
GO:0043304	regulation of mast cell degranulation	0.000761	0.0372	3.31 (13931,23,1646,9)
GO:0001816	cytokine production	0.000839	0.0396	2.33 (13931,58,1646,16)
GO:0002366	leukocyte activation involved in immune response	0.000839	0.0398	2.07 (13931,86,1646,21)
GO:0060368	regulation of Fc receptor mediated stimulatory signaling pathway	0.00088	0.0406	6.77 (13931,5,1646,4)
GO:1901223	negative regulation of NIK/NF-kappaB signaling	0.00088	0.0408	6.77 (13931,5,1646,4)
GO:1902563	regulation of neutrophil activation	0.00088	0.0409	6.77 (13931,5,1646,4)
GO:0032606	type I interferon production	0.00088	0.0411	6.77 (13931,5,1646,4)
GO:0002263	cell activation involved in immune response	0.000986	0.0444	2.04 (13931,87,1646,21)
N - is the total number of genes
B - is the total number of genes associated with a specific GO term
n - is the number of genes in the top of the user's input list or in the target set when appropriate
b - is the number of genes in the intersection
Enrichment = (b/n) / (B/N)
