# Supplementary material for: Identification of the long, edited dsRNAome of LPS-stimulated immune cells
Source: HighWire-hosted journal article supplement (doi:10.1101/gr.203992.116), 2016-04-21
Supplement: Supplemental_Table_S6.xlsx [file Supplemental_Table_S6.xlsx]

## Sheet: Sheet1
Supplemental Table S6. Oligonucleotides Used in this Study
Primer Namea	Sequence (5'-3')	Reference
Sanger Sequencing
Coq_F	CCCTCTCTCCTTCCGTCTCT	-
Coq_R	ACATTCTCATTGAAACCACCA	-
H2-T24_F	AACTGGCCTGCTCCATCTGT	-
H2-T24_R	GCCCTCCCCATCAATCAGTA	-
Padi2_F	CAGTGCTCCCTTTCCAGCTA	-
Padi2_R	CACGTAGATGTGCGCTTTGT	-
Polr3F_F	CAGAAGAGGGCGTCTGATTT	-
Polr3F_R	ACAGAATGCGGAGCAGATTT	-
Sppl2a_EER_F1	TCTTCACCCTGCTTTCCAGT	-
Sppl2a_EER_F2	CAGAAAACTACAAAGGCTGCTT	-
SPPL2A_Seq_1F	CCCTGTGATATCTGGTGAACAGATTG	-
SPPL2A_Seq_2F	GCAACAACAGCAAGAGACTTGG	-
qPCR Primers
Actb_F	GTGACGTTGACATCCGTAAAGA	PrimerBank
Actb_R	GCCGGACTCATCGTACTCC	PrimerBank
H2-T24_F	CCCTGTCCTTTTCATTTCCA	-
H2-T24_R	CTTTGGTGGTGGAGGACAGT	-
Mad2l1_F	ACAGCAGAAGGGATCAAAGC	-
Mad2l1_R	ATCAGCAGACCAAACGAACC	-
Nudt21_F	TCAGGCATTCAAAGAGAGCA	-
Nudt21_R	TGCAAGAGGCCTTTCATTTT	-
Snord50a_F	AGTCTATGATGATCCTATCCCG	Youssef et al. 2015
Snord50a_R	ATCTCAGAAGCCAGATCCGTAAGTATGG	Youssef et al. 2015
Sppl2a_F	GATTCGATGTTCAGACTGGTTCTTC	-
Sppl2a_R	CGACTCCAAGCAACGACTGAG	-
aF, forward primer; R, reverse primer
